## **Reproducibility Policies in Cardiology Journals: The REPLICA Cross-Sectional Study**

**Lucas Helal**<sup>a,b,c</sup> (0000-0002-6900-7185), **Filipe Ferrari**<sup>b</sup> (0000-0001-6929-8392), **Danielle B Rice**<sup>c</sup> (0000-0001-5615-7005), **Nadera Ahmadzai**<sup>d</sup> (0000-0002-8180-1568), **Becky Skidmore**<sup>e</sup> (0000-0001-8293-9238), **Daniel Umpierre**<sup>b,e</sup> (0000-0001-6953-0163), **David Moher**<sup>c</sup> (0000-0003-2434-4206)

### **Affiliations**

<sup>a</sup>Diretoria de Pesquisa, Hospital de Clínicas de Porto Alegre, Porto Alegre, Rio Grande do Sul, Brazil

<sup>b</sup>Graduate Program in Cardiology and Cardiovascular Sciences, School of Medicine, Universidade Federal do Rio Grande do Sul, Porto Alegre, Rio Grande do Sul, Brazil

<sup>c</sup>Centre for Journalology, Clinical Epidemiology Program, Ottawa Hospital Research Institute, Ottawa, ON, Canada K1H 8L6

<sup>d</sup>Knowledge Synthesis Group, Clinical Epidemiology Program, Ottawa Hospital Research Institute, Ottawa, ON, Canada K1H 8L

<sup>e</sup>LADD, Centro de Pesquisa Clínica, Hospital de Clínicas de Porto Alegre, Porto Alegre, Rio Grande do Sul, Brazil

### **Corresponding author**

Lucas Helal, BBSoc (Hons), MSc, PhD

Diretoria de Pesquisa, Hospital de Clínicas de Porto Alegre; Graduate Program in Cardiology and Cardiovascular Sciences, Universidade Federal do Rio Grande do Sul, Porto Alegre, RS, Brazil PO 90135-003, +55 51 3359-6237, [lhelal@hcpa.edu.br](mailto:lhelal@hcpa.edu.br)

## **Key Points**

**Question:** What is the proportion of journals displaying policies and guidance about data sharing in cardiology journals?

**Findings:** We found a low prevalence of policy and guidance for data sharing in Cardiology journals, as well as transparency and reproducibility practices; details, individual participant data sharing, registration, and completeness of reporting, for example.

**Meaning:** Journals play a role in driving reproducibility and transparency among scientific areas. Stakeholders involved in the editorial processes should be open to understand the valuable impact of data-sharing practices and learn how to implement such mechanisms, that being the case.

## Abstract

**Importance:** Transparency and data sharing are valuable practices in research, contributing to improved precision and flexibility in cumulative evidence; and ultimately expanding the research ecosystem by addressing one of the philosophical research norms that implies that knowledge belongs to society. **Objectives:** The objective of the Reproducibility Policies In Cardiology Journals (REPLICA) study was to estimate the proportions of policies and guidance for reproducibility and transparency practices among Cardiology journals, as well as to determine details of completeness of reporting and data sharing conditions whenever disclosed. **Design:** Cross-sectional analysis. **Setting:** Cross-sectional study through analyses of journals deposited in the National Library of Medicine (NLM) Catalog tagged with the “*Cardiology*” and “*Vascular Diseases*” entry terms. **Eligibility Criteria:** Cardiology journals from the NLM Catalog database that published at least one randomized clinical trial in 2018. Journals that published articles in English, Spanish, French, or Portuguese and were available in MEDLINE/PubMed were eligible for inclusion. **Exposures:** The exposures were mainly related to journal’s characteristics such as publisher operations characteristics (e.g., journal access only by subscription), indexation in the DOAJPlus, requirement for registration for RCTs, and others. **Main outcomes and measures:** We prespecified a primary composite outcome composed of data-sharing policy or guidance. Secondary outcomes were proportions of reporting guidelines within the journal’s instructions for the author’s section (e.g., CONSORT), and also other components of sharing practices. **Results:** We assessed 148 journals. Of them, 74 (50.0%, 95%CI 41.9% to 58.1%) presented policy or guidance for data sharing. We found guidance for data sharing in 68 journals (47.5% 95%CI 39.4% to 55.8%). Notably, among them, only two mentioned sharing individual participant data (IPD).

Regarding guidelines for article reporting, we identified that 132 journals displayed guidance for authors, in which 27 (20.45%, 95%CI 14.34% to 28.29%) had CONSORT and EQUATOR Network guidance content. **Conclusion and relevance:** In summary, we found a mild proportion of policies and guidance for data-sharing. Moreover, transparency practices inclined to RCTs are suboptimal, as mirrored by the very low prevalence of IPD data-sharing policy and guidance as well as specific reporting guidelines instructions for RCTs.

**Keywords:** Data sharing; Cardiology; Reproducibility; Transparency; Reporting.

## Rationale and Background

Data sharing may reduce publication bias, substandard dissemination of studies, and retractions.<sup>1-3</sup> The importance of data sharing can be considered in the context of harms identified in trials. For example, harms experienced by research participants can be investigated through deidentified data that is shared by study authors.<sup>4</sup> And, beyond the impact of the risk-benefit ratio in which a research participant is exposed (and previously known by investigators), it is often not sufficient to improve data-sharing practices spontaneously for that purpose.<sup>5</sup> Academic journals are the gatekeepers for a sustainable good science, despite some ongoing caveats.

Journals can contribute to replication failure. Many of them lack editorial policies and guidance for replication<sup>6</sup> whereas the International Committee of Medical Journal Editors (ICMJE) released a statement for their journals in 2019 requiring a mandatory disclosure in the manuscripts whether authors would share or not share their data for randomized clinical trials (RCTs) – and it should be clearly stated in a journal editorial policy.<sup>7</sup> Independent initiatives like the Center for Open Science (COS) drive data sharing by providing workflows for sharing specific items (e.g., the Transparency and Openness Guidelines/Factor - TOP).<sup>8</sup> There are also strong data-sharing standards such as the one adopted by the BMJ, which operates with a tiers beyond then “*strongly encouraged*”.

Cardiology RCTs seem to have a low prevalence of data sharing,<sup>5</sup> similar to other disciplines in biomedicine.<sup>9,10</sup> Inadequate data sharing in journals might reflect a lack of guidance and/or policy mandates by journals and publishers. The lack of transparency about editorial instructions is a problem. We should recognize that instructions for open and transparent science are still incipient. This should be emphasized given the nature of the process as a facilitator of study’s reproducibility and

replicability. For example, an experiment attempting to reproduce 100 independent studies conducted by Nosek and collaborators was only able to achieve success on reproducibility of results in 47% of studies, even though working by the side of the study's original authors.<sup>11</sup>

Therefore, our primary objective was to estimate the proportion of a composite outcome on data sharing (editorial policy or guidance) in Cardiology for RCTs. Secondary objectives were estimates of prevalences of reporting guidelines instructions, sharing practices details, open-access level, and other variables related to transparency/reproducibility that are accountable to data-sharing practices.

## Methods

This manuscript was written based on the Strengthening the Reporting of Observational Studies in Epidemiology Statement (STROBE Statement) whenever possible.<sup>12</sup> In a public repository, a full protocol, with study materials, was deposited prior to data collection (*repository link omitted for peer-reviewing purposes*). As an operational concept, for “*has policy*” we considered any content in the Aims, Scope and Instruction for Authors towards the data-sharing mandate as a whole in the journal. For “*has guidance*”, among those which “*has policy*”, it is about details on how to share the data and other contents and not only declare that the journal adheres to such practice.

### *Eligibility criteria*

To be eligible for the study, we considered journals classified as “*Cardiology*” of “*Vascular Disease*” by the National Library of Medicine (NLM) Catalog, and published at least one RCT in 2018. Journals without websites in English, Spanish, Portuguese or French languages were excluded.

### *Electronic searches and eligibility process*

An experienced medical information specialist (BS) queried the NLM Catalog through Ovid© to search for eligible journals. We used the broad subject terms “*Cardiology*” and “*Vascular Diseases*” in the NLM Catalog, considering the database as fully accurate at the journal level.

We then ran searches for each journal in PubMed/MEDLINE© with the Cochrane Highly Sensitive Search Strategy (HSSS) filter for RCTs through Ovid©,<sup>13</sup> limiting publications from January 1, 2018, to December 31, 2018. Thereafter, a library in Zotero (Zotero, v. 5.0.76) was created with all retrieved journals that had at least one

publication with all 2018 respective publications. One reviewer (FF) screened titles and abstracts of journal's reports. Whenever one RCT was detected as published in 2018, the journal in which it was published was judged eligible. After, another reviewer (LH) filled an spreadsheet with a list of included and excluded journals. The search strategy is presented in the **Appendix**.

#### *Data extraction process*

The included journals were uploaded to DistillerSR© by a library technician. We piloted 10% of the journals to tailor a standardized data extraction form (*repository link omitted for peer-reviewing purposes*). The variables were extracted independently by duplicates of reviewers (LH, DBR, FF, NA) and disagreements were resolved by consensus.

For each journal we identified its website *URL* and recorded variables of interest: (a) administrative details (e.g., publisher name); (b) bibliometric variables (e.g., 2017 JCR impact factor, DOAJPlus indexation); (c) openness (open-access level etc); (d) transparency (e.g., mention to a reporting guideline, EQUATOR Network, RCT registration requirement); (e) policy and guidance mentions of data sharing in the journal's editorial processes and details; (f) mechanisms and details of data-sharing statements whenever present, and mentions to IPD data sharing and their easy of accessibility. After our data extraction process, all journals were sent a copy of the completed data extraction for their respective journals and asked to verify or, if necessary, amend our records.



### *Statistical Analysis*

Statistical analyses were restricted to descriptive and a cross-tabulation of dichotomic variables. We calculated frequencies and estimated proportions with 95% confidence intervals for all categorical variables as well as median, interquartile range, and minimum and maximum values, excepted for pairwise cross-tabulations. These results were displayed in a density plot. Analysis were done in Stata© v. 14.0.0 and R 3.4.1 (packages “*pacman*”, “*tidyverse*” and “*reshape2*”) for MacOS.

### *Data Sharing Statement and Plan*

In addition to the protocol, our raw data (eligible and not eligible journals, Zotero library and dataset), statistical codes used in analysis, the glossary of variables, are available here (*repository link omitted for peer-reviewing purposes*). Any use of the data, or associated material, should be accompanied with their respective *digital object identifier* (DOI).

## Results

### Deviations from the protocol

We deviated from the protocol by removing the following journals from the project: Annals of Internal Medicine, JAMA, New England Journal of Medicine, BMJ, and Lancet. *A posteriori*, we perceived internal medicine journals as not reflecting Cardiology journals, which are specialty journals. Moreover, the NLM Catalog term “*Vascular Disease*” aforementioned in the methods was not planned at the moment of the first protocol draft.

### Main Results

Our search identified 450 journals. After de-duplication, 224 journals were included in our review. Twenty-three were excluded due to not having any publications in 2018, resulting in 201 potentially eligible journals. Another 50 journals were excluded as they did not publish any RCTs in 2018; one was excluded because of website inaccessibility; and two journals were not available in the eligible languages. Therefore, a total of 148 unique Cardiology journals were included. A flow diagram displays the flow of records/journals throughout the below (**Figure 1**).

<**Figure 1.** Flow Diagram of Included Journals.>

Fifteen journals were indexed in DOAJPlus (10.1%, 95% CI 6.2% to 16.2%; *N* analyzed: 148), and 81 journals required RCTs registration in a public database (55.1%, 95% CI 46.9% to 63.0%; *N* analyzed: 147) (**Table 1**).

<**Table 1.** Journalology and reporting characteristics of evaluated journals.>

For our primary outcome, 74 journals mention data sharing (whether being policy or guidance) (50.0%, 95% CI 41.9% to 58.1%; *N* analyzed = 148). When analyzing by policy or guidance, the results were similar. Six journals cited the need for a data-sharing statement in accordance with the ICMJE requirements<sup>11</sup> (8.5%, 95% CI 3.8% to 17.9%; *N* analyzed: 71). Three journals encouraged data sharing but did not indicate a need to cite the ICMJE standards<sup>11</sup> (4.2%, 95% CI, 0.8% to 12.0%; *N* analyzed: 70). In terms of the ease of accessing the editorial policy on the journal website, our assessment considered 71 journals that had them easily accessible (97.2%, 95% CI 89.3% to 99.3%; *N* analyzed: 73). Two out of 68 journals had policies explicitly related to IPD data sharing (2.9%, 95% CI 0.7% to 11.4%), as displayed in **Table 2**.

In the data-sharing guidance analysis, 56 journals disclosed whether a specific study design would be targeted. Eight provided data-sharing guidance specifically for RCTs (11.3%, 95% CI 5.6% to 21.3%). Sixty-five journals provided a mechanism for data sharing (95.6%, 95% CI 86.9% to 98.6%; *N* analyzed = 68). Importantly, out of 68 journals, only two provided important features guidance, particularly specific ones for IPD data sharing and to disclose who could request (or access) the data (*N* = 2 for both variables). Conversely, 67 disclosed the need to indicate the repository for components storage (98.5%, 95% CI 89.8% to 99.8%; *N* analyzed = 68). (**Table 2**).

Regarding instructions and guidance on how to report the clinical trials, 30 journals recommended or required using CONSORT with mention of the EQUATOR Network (20.5%, 95%CI 14.3% to 28.0%; *N* analyzed: 146); in turn, six journals did not mention anything about, and 38 journals made some recommendation without citing the CONSORT or EQUATOR Network. We also illustrated pairwise proportions between 10 variables related to a data-sharing plan in a density plot). We found that the highest association was between guidance on disclosure regarding data availability and the need to disclose the considered repository. For IPD data sharing, low associations were found with all variables. (**Figure 2**)

< **Table 2.** Study's primary and secondary outcomes.>

<**Figure 2.** Pairwise cross-tabulation density plot between variables containing guidance herein.>

## Discussion

Overall, we found the journals in our study had a mild adherence to our primary outcome, and these findings were consistent for policy and guidance analyzed separately, particularly with low adherence to IPD data sharing. Guidance for reporting clinical trials had a similar pattern, in which nearly half of the journals recommended or indicated the use of CONSORT, regardless of the presence of the EQUATOR Network for additional consultation. Moreover, we found a modest proportion for prospective registration as a condition for publication for RCTs in the evaluated journals.

Concerning where and details for how to share the data, instructions were rarely reported, notably regarding the need to indicate the type of data considered for sharing. An exception is for the mention of repository details.

Primarily, data-sharing policy or guidance in their editorial contents were modest – nearly 50%, either being an independent mandatory policy or a reference about the ICMJE 2017 Statement. This does not seem to be unique to the Cardiology field. Resnik and colleagues<sup>14</sup> found similar estimates for biomedical sciences; and the same for Computational Sciences within a very similar sample size of ours – ~38% ( $N = 171$ );<sup>15</sup> also closer to Biology and Microbiology (~ 31%).<sup>6</sup> Interestingly, Alsheikh-Ali and colleagues found that biomedical journals with higher impact factors are more prone to have data-sharing policies in their editorial contents<sup>16</sup>.

Guidance on the data-sharing process was rarely present. We need to acknowledge that we are plenty of external materials related to guidance on data-sharing – manuscripts, tutorials, recommendations of societies, independent third-parties initiatives that journals and editors can make use.<sup>21</sup> The presence of the policy *plus guidance*, although

not presumed to be a duty for the journal, could help to mitigate avoidable waste in research.

Impressingly, only two journals explicitly mentioned that IPD data sharing is highly encouraged. This is a cornerstone best practice in clinical research for a myriad of purposes and perhaps the core central message of our findings.<sup>19</sup> The lack of data-sharing guidance, whenever the policy is present and the incipient adherence to them for IPD data sharing in particular are of high priority. On the other hand, the editorial contents for what materials should be shared and the necessity to deposit in a repository is more commonly stated.<sup>20</sup>

The transparency of a trial, mirrored by a trustworthy, open-access journal; transparent reporting; and prospective registration of the trial is crucial to the usability of policies and guidance for data sharing, likely accompanying the existence of the practices.<sup>22,23</sup>

Our results found that only a few journals were indexed in DOAJPlus although claiming themselves as open access, and nearly half of them required prospective registration of randomized clinical trials, as above mentioned. Moreover, half of them did not mention anything about reporting guideline usage and, importantly, only 27 disclosed that CONSORT was recommended to report RCTs and that other reporting guidelines or extensions could be found in the EQUATOR Network website.

We should acknowledge our limitations. First, our list of variables can be considered somewhat subjective to the interpretation of the extractor given the inexistence of a lexicon for contents. Second, we limited our sample to journals indexed on the NLM Catalog and that have published at least one RCT in 2018. In addition, the term “IPD”, could be hidden in the single term “data” in policies/guidance sections of journals, leading us to miss potentially eligible statements. Lastly, our list of variables was based on core items which illustrate policies and guidance for data-sharing based on the

overall literature. An expanded investigation may provide questions we could not be able to answer.

On the other hand, we poise that our results should be considered by editors, funders and other stakeholders, potentially acting to drive research reproducibility and usability.<sup>24,25</sup> Also, evidence-synthesis groups may benefit by IPD data for cumulative meta-analysis and IPD meta-analysis – otherwise, they would be unable to conduct it<sup>26</sup>; or we could go through basic arguments from philosophy of science, which state clearly that “*the knowledge is of no one*” and that data sharing should be an categorical imperative of researchers, once patients put themselves at risk whenever they are being enrolled in a trial<sup>27,28</sup>. There is too much to be done in all areas of research, but the Cardiology field, paradoxically, is filled by important, well-funded and well- designed trials that often change care decisions but lacks a lot on transparency and data-sharing policies. The private sponsorship, particularly industry funding, should incorporate practices herein; or, in another circumstances, regulatory agencies.

## **Conclusion**

In conclusion, Cardiology journals rarely mention data-sharing policies, transparency and reproducibility standards, and our empirical data supports a claim for the need for urgent improvement of such policies to mitigate this situation.

**Ethical Approval & IRB:** ethical approval for this study was exempted given no humans or animals involvement at any part.

### **Acknowledgments**

We acknowledge Mr. Raymond Daniel (the Ottawa Hospital Research Institute) for all the contributions with the library management and all editorial boards of included journals to provide feedback in the liability of our data-extraction.

### **Contributions**

LH, DU and DM conceived the study; LH, DBR, DU and DM refined study's protocol; BS took care of all librarian activities; LH, FF, DBR and NA screened and confirmed eligibility of journals; LH, FF and DBR extracted the data; LH and FF tabulated results and made contact with journal editors for double checking; LH did all statistical analysis; LH wrote the first draft of the manuscript; all authors made substantial considerations to the following revisions and approved the final version of it.

### **Funding**

LH is funded by the Diretoria de Pesquisa (Hospital de Clínicas de Porto Alegre) and was granted with a research fellowship from the Coordenação de Aperfeiçoamento de Pessoal de Ensino Superior (Finance Code: 001, Graduate Program in Cardiology and Cardiovascular Sciences, School of Medicine, Universidade Federal do Rio Grande do Sul, under the number 88882.181760/2018-01) as well as FF (number: 88887.473530/2020-00). DBR is funded by a Canadian Institutes of Health Research Vanier Graduate Scholarship. NA was supported by the Knowledge Synthesis Group



(the Ottawa Hospital Research Institute). DM is supported by a University Research Chair.

### **Potential Conflicts of Interests**

The authors do declare no potential financial and non-financial conflicts of interests related to this research project for any retrospective and prospective stage.

### **Data and results dissemination**

As stated above, this research project works under a data and materials sharing regimen. Moreover, the results will be presented to third parties, send in an aggregated data manner to all journal editors previously screened and forwarded to interested stakeholders for potential improvements (such as the ICMJE, COPE, WAME and others) as well as to community overall.

## References

1. Ross JS, Madigan D, Hill KP, Egilman DS, Wang Y, Krumholz HM. Pooled analysis of rofecoxib placebo-controlled clinical trial data: lessons for postmarket pharmaceutical safety surveillance. *Arch Intern Med*. Nov 23 2009;169(21):1976-85. doi:10.1001/archinternmed.2009.394
2. Riley RD, Lambert PC, Abo-Zaid G. Meta-analysis of individual participant data: rationale, conduct, and reporting. *BMJ*. 2010;340:c221. doi:10.1136/bmj.c221
3. Moylan EC, Kowalczyk MK. Why articles are retracted: a retrospective cross-sectional study of retraction notices at BioMed Central. *BMJ Open*. Nov 23 2016;6(11):e012047. doi:10.1136/bmjopen-2016-012047
4. Gay HC, Baldrige AS, Huffman MD. Feasibility, Process, and Outcomes of Cardiovascular Clinical Trial Data Sharing: A Reproduction Analysis of the SMART-AF Trial. *JAMA Cardiology*. Dec 1 2017;2(12):1375-1379. doi:10.1001/jamacardio.2017.3808.
5. Vaduganathan M, Nagarur A, Qamar A, et al. Availability and Use of Shared Data From Cardiometabolic Clinical Trials. *Circulation*. 2018/02/27 2018;137(9):938-947. doi:10.1161/CIRCULATIONAHA.117.031883.
6. Vasilevsky NA, Minnier J, Haendel MA, Champieux RE. Reproducible and reusable research: are journal data sharing policies meeting the mark? *PeerJ*. 2017;5:e3208. doi:10.7717/peerj.3208.
7. Taichman DB, Sahni P, Pinborg A, et al. Data Sharing Statements for Clinical Trials: A Requirement of the International Committee of Medical Journal Editors. *Ann Intern Med*. 2017:63-65.
8. Nosek BA, Alter G, Banks GC, et al. Promoting an open research culture. *Science*. 2015;348(6242):1422. doi:10.1126/science.aab2374.
9. Iqbal SA, Wallach JD, Khoury MJ, Schully SD, Ioannidis JP. Reproducible Research Practices and Transparency across the Biomedical Literature. *PLoS Biol*. Jan 2016;14(1):e1002333. doi:10.1371/journal.pbio.1002333.
10. Wallach JD, Boyack KW, Ioannidis JPA. Reproducible research practices, transparency, and open access data in the biomedical literature, 2015-2017. *PLoS Biol*. Nov 2018;16(11):e2006930. doi:10.1371/journal.pbio.2006930.
11. Collaboration OS. PSYCHOLOGY. Estimating the reproducibility of psychological science. *Science*. Aug 2015;349(6251):aac4716. doi:10.1126/science.aac4716.

12. von Elm E, Altman DG, Egger M, et al. The Strengthening the Reporting of Observational Studies in Epidemiology (STROBE) statement: guidelines for reporting observational studies. *J Clin Epidemiol*. 2008;61(4):344-349.  
doi:10.1016/j.jclinepi.2007.11.008.
13. Dickersin K, Scherer R, Lefebvre C. Identifying relevant studies for systematic reviews. *BMJ*. Nov 12 1994;309(6964):1286-91. doi:10.1136/bmj.309.6964.1286.
14. Resnik DB, Morales M, Landrum R, et al. Effect of impact factor and discipline on journal data sharing policies. *Account Res*. 2019/04/03 2019;26(3):139-156.  
doi:10.1080/08989621.2019.1591277.
15. Stodden V, Guo P, Ma Z. Toward Reproducible Computational Research: An Empirical Analysis of Data and Code Policy Adoption by Journals. *PLoS One*. 2013;8(6):e67111. doi:10.1371/journal.pone.0067111.
16. Alsheikh-Ali AA, Qureshi W, Al-Mallah MH, Ioannidis JPA. Public Availability of Published Research Data in High-Impact Journals. *PLoS One*. 2011;6(9):e24357.  
doi:10.1371/journal.pone.0024357.
17. Kidwell MC, Lazarević LB, Baranski E, et al. Badges to Acknowledge Open Practices: A Simple, Low-Cost, Effective Method for Increasing Transparency. *PLoS Biol*. 2016;14(5):e1002456. doi:10.1371/journal.pbio.1002456.
18. Boutron I, Dechartres A, Baron G, Li J, Ravaud P. Sharing of Data From Industry-Funded Registered Clinical Trials. *JAMA*. 2016;315(24):2729-2730.  
doi:10.1001/jama.2016.6310.
19. Ohmann C, Banzi R, Canham S, et al. Sharing and reuse of individual participant data from clinical trials: principles and recommendations. *BMJ Open*. 2017;7(12):e018647. doi:10.1136/bmjopen-2017-018647.
20. Banzi R, Canham S, Kuchinke W, Krleza-Jeric K, Demotes-Mainard J, Ohmann C. Evaluation of repositories for sharing individual-participant data from clinical studies. *Trials*. 2019/03/15 2019;20(1):169. doi:10.1186/s13063-019-3253-3;
21. Wilkinson MD, Dumontier M, Aalbersberg IJ, et al. The FAIR Guiding Principles for scientific data management and stewardship. *Scient Data*. 2016/03/15 2016;3(1):160018. doi:10.1038/sdata.2016.18.
22. Turner L, Shamseer L, Altman DG, et al. Consolidated standards of reporting trials (CONSORT) and the completeness of reporting of randomised controlled trials (RCTs) published in medical journals. *Cochrane Database of Systematic Reviews*. 2012;(11)doi:10.1002/14651858.MR000030.pub2.

23. Munafò MR, Nosek BA, Bishop DVM, et al. A manifesto for reproducible science. *Nature Human Behav.* 2017/01/10 2017;1(1):0021. doi:10.1038/s41562-016-0021.
24. Ioannidis JPA. How to Make More Published Research True. *PLOS Med.* 2014;11(10):e1001747. doi:10.1371/journal.pmed.1001747.
25. Ebrahim S, Sohani ZN, Montoya L, et al. Reanalyses of Randomized Clinical Trial Data. *JAMA.* 2014;312(10):1024-1032. doi:10.1001/jama.2014.9646.
26. Rogozinska E, Marlin N, Thangaratinam S, Khan KS, Zamora J. Meta-analysis using individual participant data from randomised trials: opportunities and limitations created by access to raw data. *Evid Based Med.* Oct 2017;22(5):157-162. doi:10.1136/ebmed-2017-110775.
27. Hardwicke TE, Mathur MB, MacDonald K, et al. Data availability, reusability, and analytic reproducibility: evaluating the impact of a mandatory open data policy at the journal *Cognition*. *R Soc Open Sci.* Aug 2018;5(8):180448. doi:10.1098/rsos.180448.
28. Rowhani-Farid A, Barnett AG. Has open data arrived at the British Medical Journal (BMJ)? An observational study. *BMJ Open.* 2016;6(10):e011784. doi:10.1136/bmjopen-2016-011784.

## Tables and Figures

**Figure 1.** Flow Diagram of Included Journals.

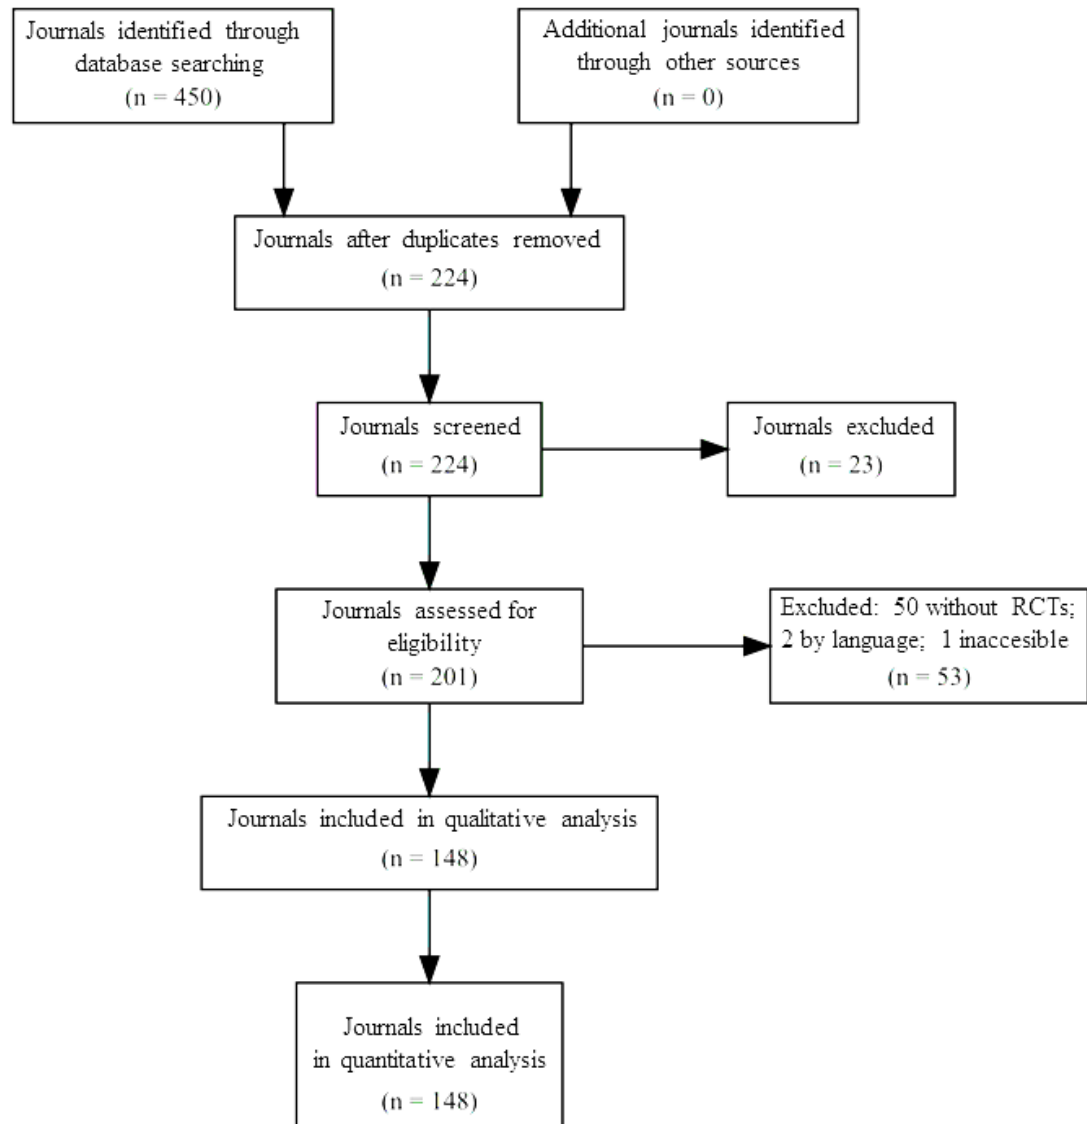

**Table 1.** Journalology and reporting characteristics of evaluated journals.

| <b>Variables</b>                              | <b>Estimates</b>                      |
|-----------------------------------------------|---------------------------------------|
| <b>Publisher Type (N = 148)</b>               |                                       |
| Academic                                      | 3 (2.03%; 95%CI 6.46% to 61.7%)       |
| Commercial                                    | 145 (97.97%; 95% CI 93.82% to 99.35%) |
| <b>Open Access Type (N =148)</b>              |                                       |
| Exclusively Subscription                      | 2 (1.35%; 95%CI 3.32% to 5.32%)       |
| Hybrid                                        | 134 (90.54%; 95%CI 84.57% to 94.35%)  |
| Exclusively Open Access                       | 12 (8.11%; 95%CI 4.63% to 13.81%)     |
| <b>DOAJPlus Indexing (N = 148)</b>            |                                       |
| No                                            | 133 (89.96%; 95%CI 83.78% to 93.83%)  |
| Yes                                           | 15 (10.14%; 95%CI 6.16% to 16.21%)    |
| <b>JCR Impact Factor* (N = 148)</b>           | 2.73 (1.61 to 4.55; 0.36 to 23.42)    |
| <b>RCT Registration Requirement (N = 147)</b> |                                       |
| No                                            | 1 (0.68%; 95%CI 0.09% to 4.77%)       |
| No explicit mention                           | 62 (42.18%; 95%CI 34.37% to 50.39%)   |
| Encouragement                                 | 3 (2.04%; 95%CI 0.65% to 6.21%)       |
| Mandatory                                     | 81 (55.10%; 95%CI 49.90% to 62.03%)   |
| <b>Reporting Guidelines (N = 132)</b>         |                                       |
| No                                            | 64 (48.48%; 95%CI 39.97% to 57.08%)   |
| Others                                        | 5 (3.79%; 95%CI 1.56% to 8.87%)       |
| Link to external source                       | 5 (3.79%; 95%CI 1.56% to 8.87%)       |
| No CONSORT neither EQUATOR Network            | 31 (23.48%; 95%CI 16.95% to 31.57%)   |
| CONSORT with EQUATOR Network                  | 27 (20.45%; 95%CI 14.34% to 28.29%)   |

**Notes:** 95%CI – 95% frequentist confidence interval; JCR Impact Factor\* - median (p25% to p75%; min – max); N – N analyzed.

**Table 2.** Study’s primary and secondary outcomes.

| <b>Variables</b>                                   | <b>Estimates</b>                     |
|----------------------------------------------------|--------------------------------------|
| <b>Primary Outcome (N = 148)</b>                   |                                      |
| Composite Outcome                                  | 74 (50%; 95%CI 41.90% to 58.10%)     |
| Policies                                           | 74 (50%; 95%CI 41.90% to 58.10%)     |
| Guidance                                           | 68 (47.50%; 95%CI 39.40% to 55.80%)  |
| <b>Secondary Outcomes</b>                          |                                      |
| <b>Policies</b>                                    |                                      |
| <b>Data-Sharing Statement Requirement (N = 73)</b> |                                      |
| Encouragement                                      | 67 (91.78%; 95%CI 82.60 % to 96.33%) |
| Only cites the 2017 ICMJE Statement                | 3 (4.11%; 95%CI 1.25% to 12.27%)     |
| Mandatory                                          | 3 (4.11%; 95%CI 1.25% to 12.27%)     |
| <b>Policy Target (N = 73)</b>                      |                                      |
| None                                               | 11 (15.07%; 95%CI 08.42% to 25.49%)  |
| Experimental designs in general                    | 59 (80.82%; 95%CI 69.88% to 88.44%)  |
| For RCTs and other designs                         | 1 (1.37%; 95%CI 1.83% to 9.48%)      |
| Only for RCTs                                      | 2 (2.74%; 95%CI 6.63% to 10.61%)     |
| <b>Accessibility Level (N = 73)</b>                |                                      |
| Hard to find                                       | 2 (2.74%; 95%CI 0.66% to 10.61%)     |
| Easy to find                                       | 71 (97.26%; 95%CI 89.38% to 99.33%)  |
| <b>Guidance</b>                                    |                                      |
| <b>Guidance Target (N = 68)</b>                    |                                      |
| None                                               | 6 (8.45%; 95%CI 3.77% to 17.86%)     |
| Yes (unclear design)                               | 56 (78.87%; 95%CI 67.55% to 87.00%)  |
| For RCTs and other designs                         | 8 (11.25%; 95%CI 5.63% to 21.25%)    |
| Only for RCTs                                      | 1 (1.41%; 95%CI 1.88% to 9.74%)      |
| <b>How to share the data</b>                       |                                      |
| Unclear (N = 68)                                   | 1 (1.45%; 95%CI 0.19% to 10.02%)     |
| Materials (N = 63)                                 | 59 (93.65%; 95%CI 83.89% to 97.66%)  |
| Repository (N = 68)                                | 65 (95.59%; 95%CI 86.85% to 98.61%)  |
| IPD data-sharing (N = 68)                          | 2 (2.94%; 95%CI 0.71% to 11.37%)     |
| Who (N = 68)                                       | 2 (2.94%; 95%CI 0.71% to 11.37%)     |
| Availability Conditions (N = 67)                   | 61 (91.04%; 95%CI 81.12% to 96.00%)  |

**Notes:** 95%CI – 95% frequentist confidence interval; “Guidance” is conditional to “Policy” variable. N – N analyzed.

**Figure 2.** Pairwise cross-tabulation density plot between variables containing guidance herein.

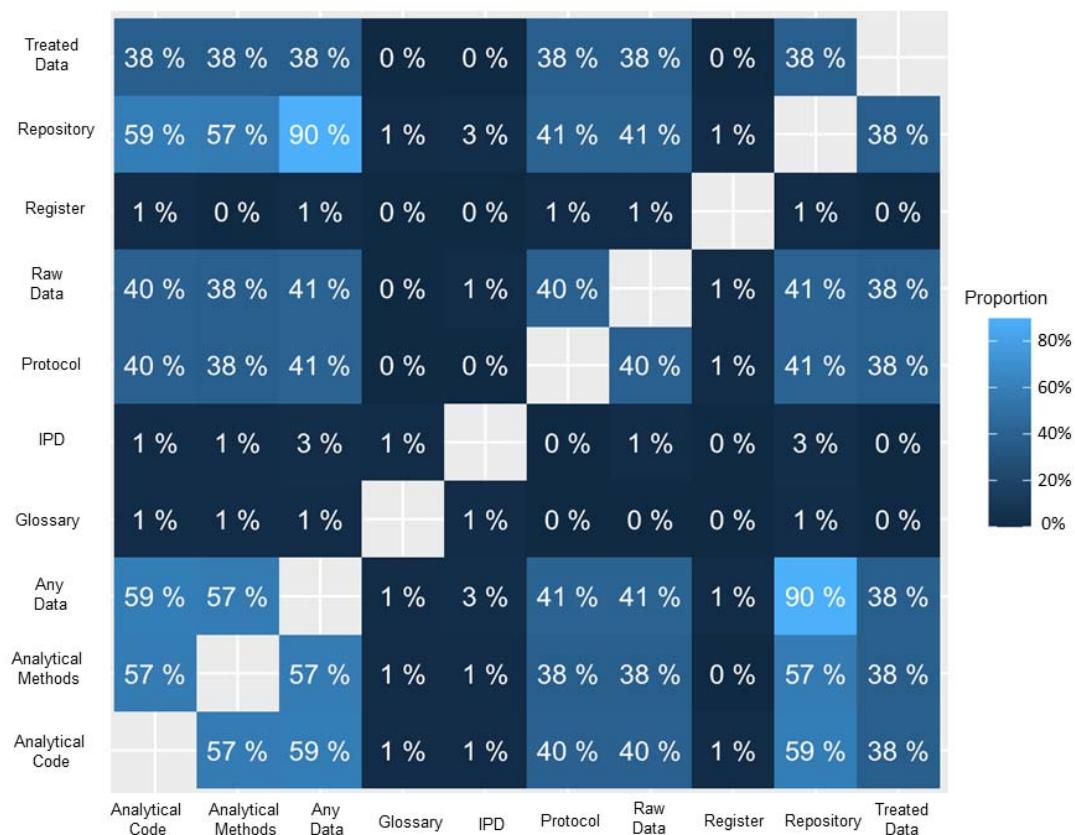



## Appendix 1 Search Strategy

Final Strategy

2018 Dec 27

MEDLINE

Database: Ovid MEDLINE(R) and Epub Ahead of Print, In-Process & Other Non-Indexed Citations and Daily <1946 to December 26, 2018>

Search Strategy:

- 
- 1 randomized controlled trial.pt. (473462)
  - 2 controlled clinical trial.pt. (92820)
  - 3 randomized.ab. (430114)
  - 4 placebo.ab. (194218)
  - 5 clinical trials as topic.sh. (185597)
  - 6 randomly.ab. (302507)
  - 7 trial.ti. (191861)
  - 8 or/1-7 (1189111)
  - 9 exp animals/ not humans.sh. (4530051)
  - 10 8 not 9 (1093782)
  - 11 limit 10 to yr="2018" (63666)
  - 12 acta cardiologica.jn. (4415)
  - 13 acta myologica.jn. (311)
  - 14 acute cardiac care.jn. (356)
  - 15 advances in cardiology.jn. (1047)
  - 16 american heart journal.jn. (24134)
  - 17 "american journal of cardiology".jn. (36653)
  - 18 "american journal of cardiovascular drugs".jn. (808)
  - 19 "american journal of hypertension".jn. (7185)
  - 20 "american journal of physiology".jn. (54733)
  - 21 "anatolian journal of cardiology".jn. (1125)
  - 22 angiologia i sosudistaia khirurgiia angiology & vascular surgery.jn. (1396)
  - 23 angiology.jn. (7725)
  - 24 annales de cardiologie et d angeiologie.jn. (3917)
  - 25 "annals of cardiac anaesthesia".jn. (1275)
  - 26 "annals of noninvasive electrocardiology".jn. (1290)
  - 27 "annals of thoracic & cardiovascular surgery".jn. (2061)
  - 28 "annals of vascular surgery".jn. (6304)
  - 29 "archives of cardiovascular diseases".jn. (1119)
  - 30 archivos de cardiologia de mexico.jn. (1334)
  - 31 arquivos brasileiros de cardiologia.jn. (8305)
  - 32 arteriosclerosis thrombosis & vascular biology.jn. (8916)
  - 33 asian cardiovascular & thoracic annals.jn. (2760)
  - 34 atherosclerosis.jn. (13504)
  - 35 atherosclerosis supplements.jn. (383)
  - 36 basic research in cardiology.jn. (3492)
  - 37 blood coagulation & fibrinolysis.jn. (3945)
  - 38 blood pressure.jn. (1500)
  - 39 blood pressure monitoring.jn. (1393)
  - 40 bmc cardiovascular disorders.jn. (1839)
  - 41 "brazilian journal of cardiovascular surgery".jn. (292)
  - 42 "canadian journal of cardiology".jn. (6079)

43 cardiac electrophysiology clinics.jn. (461)  
44 cardiology.jn. (4517)  
45 cardiology clinics.jn. (1886)  
46 "cardiology in review".jn. (1006)  
47 cardiology in the young.jn. (3693)  
48 cardiology journal.jn. (1466)  
49 cardiorenal medicine.jn. (267)  
50 cardiovascular & interventional radiology.jn. (5736)  
51 cardiovascular diabetology.jn. (1557)  
52 cardiovascular drugs & therapy.jn. (2629)  
53 cardiovascular engineering & technology.jn. (255)  
54 cardiovascular & hematological agents in medicinal chemistry.jn. (355)  
55 cardiovascular & hematological disorders drug targets.jn. (365)  
56 "cardiovascular intervention and therapeutics".jn. (555)  
57 "cardiovascular journal of africa".jn. (1217)  
58 cardiovascular pathology.jn. (1549)  
59 cardiovascular research.jn. (10628)  
60 cardiovascular revascularization medicine.jn. (1399)  
61 cardiovascular therapeutics.jn. (620)  
62 cardiovascular toxicology.jn. (694)  
63 cardiovascular ultrasound.jn. (701)  
64 catheterization & cardiovascular interventions.jn. (8541)  
65 cerebrovascular diseases.jn. (3071)  
66 cerebrovascular diseases extra.jn. (142)  
67 circulation.jn. (43168)  
68 "circulation arrhythmia and electrophysiology".jn. (1838)  
69 circulation cardiovascular imaging.jn. (1512)  
70 circulation cardiovascular interventions.jn. (1462)  
71 circulation cardiovascular quality & outcomes.jn. (1295)  
72 "circulation genomic and precision medicine".jn. (151)  
73 circulation heart failure.jn. (1416)  
74 Circulation journal.jn. (6511)  
75 circulation research.jn. (17193)  
76 clinical & applied thrombosis hemostasis.jn. (1947)  
77 clinical & experimental hypertension.jn. (192)  
78 clinical cardiology.jn. (6339)  
79 clinical hemorheology & microcirculation.jn. (2290)  
80 clinical research in cardiology.jn. (1874)  
81 clinical research in cardiology supplements.jn. (45)  
82 clinica e investigacion en arteriosclerosis.jn. (268)  
83 congenital heart disease.jn. (1295)  
84 coronary artery disease.jn. (2766)  
85 "critical pathways in cardiology a journal of evidence based medicine".jn. (552)  
86 current atherosclerosis reports.jn. (1475)  
87 current cardiology reports.jn. (1795)  
88 current cardiology reviews.jn. (469)  
89 current heart failure reports.jn. (597)  
90 current hypertension reports.jn. (1737)  
91 current hypertension reviews.jn. (195)  
92 current neurovascular research.jn. (607)  
93 current opinion in cardiology.jn. (2441)  
94 current opinion in nephrology & hypertension.jn. (2484)  
95 current problems in cardiology.jn. (614)  
96 current vascular pharmacology.jn. (1131)  
97 diabetes & vascular disease research.jn. (747)

98 echocardiography.jn. (4912)  
99 esc heart failure.jn. (365)  
100 eurointervention.jn. (3530)  
101 europace.jn. (5210)  
102 european heart journal.jn. (17292)  
103 european heart journal acute cardiovascular care.jn. (606)  
104 european heart journal cardiovascular imaging.jn. (2010)  
105 european heart journal cardiovascular pharmacotherapy.jn. (211)  
106 "european heart journal quality of care & clinical outcomes".jn. (199)  
107 "european journal of cardio thoracic surgery".jn. (12260)  
108 "european journal of cardiovascular nursing".jn. (1001)  
109 "european journal of heart failure".jn. (3426)  
110 "european journal of preventive cardiology".jn. (1718)  
111 "european journal of vascular & endovascular surgery".jn. (6235)  
112 "expert review of cardiovascular therapy".jn. (2059)  
113 future cardiology.jn. (1063)  
114 general thoracic & cardiovascular surgery.jn. (1771)  
115 giornale italiano di cardiologia.jn. (6827)  
116 global heart.jn. (417)  
117 harvard heart letter.jn. (1851)  
118 heart.jn. (10152)  
119 heart advisor.jn. (1129)  
120 heart & vessels.jn. (2561)  
121 heart failure clinics.jn. (772)  
122 heart failure reviews.jn. (973)  
123 heart lung & circulation.jn. (2733)  
124 heart & lung.jn. (4256)  
125 heart rhythm.jn. (5542)  
126 heart surgery forum.jn. (1751)  
127 "hjc hellenic journal of cardiology".jn. (1373)  
128 herz.jn. (3289)  
129 herzschriltmacterherapie und elektrophysiologie.jn. (854)  
130 high blood pressure & cardiovascular prevention.jn. (362)  
131 hipertension y riesgo vascular.jn. (137)  
132 hypertension.jn. (14155)  
133 hypertension in pregnancy.jn. (765)  
134 hypertension research clinical & experimental.jn. (3495)  
135 indian heart journal.jn. (5139)  
136 innovations.jn. (40)  
137 interactive cardiovascular & thoracic surgery.jn. (6457)  
138 international angiology.jn. (2153)  
139 international heart journal.jn. (1626)  
140 "international journal of cardiology".jn. (25551)  
141 "international journal of stroke".jn. (1949)  
142 interventional cardiology clinics.jn. (368)  
143 jacc cardiovascular imaging.jn. (2748)  
144 jacc cardiovascular interventions.jn. (3812)  
145 jacc clinical electrophysiology.jn. (752)  
146 jacc heart failure.jn. (966)  
147 jama cardiology.jn. (906)  
148 journal de medecine vasculaire.jn. (95)  
149 "journal of atherosclerosis & thrombosis".jn. (1874)  
150 "journal of cardiac failure".jn. (2611)  
151 "journal of cardiac surgery".jn. (4187)  
152 "journal of cardiology".jn. (3761)

- 153 "journal of cardiopulmonary rehabilitation & prevention".jn. (704)
- 154 "journal of cardiothoracic & vascular anesthesia".jn. (6770)
- 155 "journal of cardiothoracic surgery".jn. (1694)
- 156 "journal of cardiovascular computed tomography".jn. (980)
- 157 "journal of cardiovascular electrophysiology".jn. (6387)
- 158 "journal of cardiovascular magnetic resonance".jn. (1380)
- 159 "journal of cardiovascular medicine".jn. (2554)
- 160 "journal of cardiovascular nursing".jn. (1847)
- 161 "journal of cardiovascular pharmacology".jn. (11559)
- 162 "journal of cardiovascular pharmacology & therapeutics".jn. (1093)
- 163 "journal of cardiovascular surgery".jn. (7033)
- 164 "journal of cardiovascular translational research".jn. (826)
- 165 "journal of cerebral blood flow & metabolism".jn. (6142)
- 166 "journal of clinical hypertension".jn. (3218)
- 167 "journal of echocardiography".jn. (403)
- 168 "journal of electrocardiology".jn. (4950)
- 169 "journal of endovascular therapy".jn. (2533)
- 170 "journal of heart & lung transplantation".jn. (6412)
- 171 "journal of heart valve disease".jn. (3427)
- 172 "journal of human hypertension".jn. (4508)
- 173 "journal of hypertension".jn. (9769)
- 174 "journal of interventional cardiac electrophysiology".jn. (2071)
- 175 "journal of interventional cardiology".jn. (1771)
- 176 "journal of invasive cardiology".jn. (4815)
- 177 "journal of molecular & cellular cardiology".jn. (8129)
- 178 "journal of nuclear cardiology".jn. (3968)
- 179 "journal of stroke & cerebrovascular diseases".jn. (4546)
- 180 "journal of the american college of cardiology".jn. (25113)
- 181 "journal of the american heart association".jn. (3640)
- 182 "journal of the american society of hypertension".jn. (1088)
- 183 "journal of thoracic & cardiovascular surgery".jn. (26498)
- 184 "journal of thrombosis & haemostasis".jn. (6520)
- 185 "journal of vascular access".jn. (1492)
- 186 "journal of vascular & interventional radiology".jn. (6893)
- 187 "journal of vascular nursing".jn. (694)
- 188 "journal of vascular research".jn. (1321)
- 189 "journal of vascular surgery".jn. (15047)
- 190 j vasc surg venous lymphat disord.ja. (794)
- 191 "journal of veterinary cardiology".jn. (583)
- 192 kardiologia polska.jn. (6764)
- 193 kardiologia.jn. (13528)
- 194 methodist debakey cardiovascular journal.jn. (579)
- 195 microcirculation.jn. (1315)
- 196 microvascular research.jn. (3525)
- 197 minerva cardioangiologica.jn. (5861)
- 198 "multimedia manual of cardiothoracic surgery".jn. (419)
- 199 nature reviews cardiology.jn. (1941)
- 200 nutrition metabolism & cardiovascular diseases.jn. (2277)
- 201 pacing & clinical electrophysiology.jn. (11111)
- 202 pediatric cardiology.jn. (5323)
- 203 perfusion.jn. (2019)
- 204 phlebology.jn. (1101)
- 205 pregnancy hypertension.jn. (1018)
- 206 progress in cardiovascular diseases.jn. (2187)
- 207 reviews in cardiovascular medicine.jn. (787)

- 208 revista espanola de cardiologia.jn. (8986)
- 209 revista portuguesa de cardiologia.jn. (3966)
- 210 revista portuguesa de cirurgia cardio toracica e vascular.jn. (745)
- 211 scandinavian cardiovascular journal.jn. (1371)
- 212 scandinavian cardiovascular journal supplement.jn. (33)
- 213 seminars in thoracic & cardiovascular surgery.jn. (1884)
- 214 seminars in thoracic & cardiovascular surgery pediatric cardiac surgery annual.jn. (384)
- 215 seminars in thrombosis & hemostasis.jn. (3115)
- 216 seminars in vascular surgery.jn. (932)
- 217 shock.jn. (4807)
- 218 stroke.jn. (19491)
- 219 techniques in vascular & interventional radiology.jn. (614)
- 220 texas heart institute journal.jn. (3766)
- 221 therapeutic advances in cardiovascular disease.jn. (381)
- 222 thoracic & cardiovascular surgeon reports.jn. (121)
- 223 thrombosis & haemostasis.jn. (13516)
- 224 thrombosis research.jn. (13042)
- 225 topics in stroke rehabilitation.jn. (1143)
- 226 translational stroke research.jn. (671)
- 227 trends in cardiovascular medicine.jn. (1767)
- 228 turk kardiyoloji dernegi arsivi.jn. (1877)
- 229 vasa.jn. (2946)
- 230 vascular.jn. (1210)
- 231 vascular & endovascular surgery.jn. (1708)
- 232 vascular health & risk management.jn. (1121)
- 233 vascular medicine.jn. (1343)
- 234 vascular pharmacology.jn. (1317)
- 235 world journal for pediatric & congenital heart surgery.jn. (1049)
- 236 zhonghua xin xue guan bing za zhi.ja. (4685)
- 237 or/12-236 [CARDIOLOGY JOURNALS - NLM CATALOG] (917693)
- 238 11 and 12 [acta cardiologica] (3)
- 239 11 and 13 [acta myologica] (0)
- 240 11 and 14 [acute cardiac care] (0)
- 241 11 and 15 [advances in cardiology] (0)
- 242 11 and 16 [american heart journal] (113)
- 243 11 and 17 [american journal of cardiology] (88)
- 244 11 and 18 [american journal of cardiovascular drugs] (31)
- 245 11 and 19 [american journal of hypertension] (17)
- 246 11 and 20 [american journal of physiology] (0)
- 247 11 and 21 [anatolian journal of cardiology] (8)
- 248 11 and 22 [angiologia i sosudistaia khirurgiia angiology & vascular surgery] (5)
- 249 11 and 23 [angiology] (11)
- 250 11 and 24 [Annales de cardiologie et d'angiologie] (5)
- 251 11 and 25 [annals of cardiac anaesthesia] (16)
- 252 11 and 26 [annals of noninvasive electrocardiology] (7)
- 253 11 and 27 [annals of thoracic & cardiovascular surgery] (3)
- 254 11 and 28 [annals of vascular surgery] (22)
- 255 11 and 29 [archives of cardiovascular diseases] (5)
- 256 11 and 30 [archivos de cardiologia de mexico] (1)
- 257 11 and 31 [arquivos brasileiros de cardiologia] (12)
- 258 11 and 32 [arteriosclerosis thrombosis & vascular biology] (13)
- 259 11 and 33 [asian cardiovascular & thoracic annals] (4)
- 260 11 and 34 [atherosclerosis] (38)
- 261 11 and 35 [atherosclerosis supplements] (0)
- 262 11 and 36 [basic research in cardiology] (1)

263 11 and 37 [blood coagulation & fibrinolysis] (4)  
264 11 and 38 [blood pressure] (7)  
265 11 and 39 [blood pressure monitoring] (7)  
266 11 and 40 [bmc cardiovascular disorders] (35)  
267 11 and 41 ["brazilian journal of cardiovascular surgery"] (12)  
268 11 and 42 [canadian journal of cardiology] (23)  
269 11 and 43 [cardiac electrophysiology clinics] (3)  
270 11 and 44 [cardiology] (8)  
271 11 and 45 [cardiology clinics] (2)  
272 11 and 46 [cardiology in review] (9)  
273 11 and 47 [cardiology in the young] (6)  
274 11 and 48 [cardiology journal] (22)  
275 11 and 49 [cardiorenal medicine] (2)  
276 11 and 50 [cardiovascular & interventional radiology] (17)  
277 11 and 51 [cardiovascular diabetology] (21)  
278 11 and 52 [cardiovascular drugs & therapy] (22)  
279 11 and 53 [cardiovascular engineering & technology] (0)  
280 11 and 54 [cardiovascular & hematological agents in medicinal chemistry] (1)  
281 11 and 55 [cardiovascular & hematological disorders drug targets] (5)  
282 11 and 56 [cardiovascular intervention and therapeutics] (4)  
283 11 and 57 [cardiovascular journal of africa] (1)  
284 11 and 58 [cardiovascular pathology] (0)  
285 11 and 59 [cardiovascular research] (9)  
286 11 and 60 [cardiovascular revascularization medicine] (47)  
287 11 and 61 [cardiovascular therapeutics] (16)  
288 11 and 62 [cardiovascular toxicology] (4)  
289 11 and 63 [cardiovascular ultrasound] (1)  
290 11 and 64 [catheterization & cardiovascular interventions] (88)  
291 11 and 65 [cerebrovascular diseases] (5)  
292 11 and 66 [cerebrovascular diseases extra] (0)  
293 11 and 67 [circulation] (127)  
294 11 and 68 [circulation arrhythmia and electrophysiology] (15)  
295 11 and 69 [circulation cardiovascular imaging] (3)  
296 11 and 70 [circulation cardiovascular interventions] (30)  
297 11 and 71 [circulation cardiovascular quality & outcomes] (24)  
298 11 and 72 [circulation genomic and precision medicine] (4)  
299 11 and 73 [circulation heart failure] (19)  
300 11 and 74 [Circulation journal] (33)  
301 11 and 75 [circulation research] (18)  
302 11 and 76 [clinical & applied thrombosis hemostasis] (15)  
303 11 and 77 [clinical & experimental hypertension] (0)  
304 11 and 78 [clinical cardiology] (46)  
305 11 and 79 [clinical hemorheology & microcirculation] (13)  
306 11 and 80 [clinical research in cardiology] (37)  
307 11 and 81 [clinical research in cardiology supplements] (0)  
308 11 and 82 [clinica e investigacion en arteriosclerosis] (4)  
309 11 and 83 [congenital heart disease] (5)  
310 11 and 84 [coronary artery disease] (19)  
311 11 and 85 [critical pathways in cardiology] (3)  
312 11 and 86 [current atherosclerosis reports] (6)  
313 11 and 87 [current cardiology reports] (19)  
314 11 and 88 [current cardiology reviews] (5)  
315 11 and 89 [current heart failure reports] (5)  
316 11 and 90 [current hypertension reports] (9)  
317 11 and 91 [current hypertension reviews] (5)



318 11 and 92 [current neurovascular research] (1)  
319 11 and 93 [current opinion in cardiology] (18)  
320 11 and 94 [current opinion in nephrology & hypertension] (6)  
321 11 and 95 [current problems in cardiology] (2)  
322 11 and 96 [current vascular pharmacology] (14)  
323 11 and 97 [diabetes & vascular disease research] (7)  
324 11 and 98 [echocardiography] (5)  
325 11 and 99 [ESC heart failure] (38)  
326 11 and 100 [eurointervention] (47)  
327 11 and 101 [europace] (50)  
328 11 and 102 [european heart journal] (80)  
329 11 and 103 [european heart journal acute cardiovascular care] (13)  
330 11 and 104 [european heart journal cardiovascular imaging] (12)  
331 11 and 105 [european heart journal cardiovascular pharmacotherapy] (10)  
332 11 and 106 [european heart journal quality of care & clinical outcomes] (6)  
333 11 and 107 [european journal of cardio thoracic surgery] (26)  
334 11 and 108 [european journal of cardiovascular nursing] (19)  
335 11 and 109 [european journal of heart failure] (54)  
336 11 and 110 [european journal of preventive cardiology] (26)  
337 11 and 111 [european journal of vascular & endovascular surgery] (21)  
338 11 and 112 [expert review of cardiovascular therapy] (13)  
339 11 and 113 [future cardiology] (4)  
340 11 and 114 [general thoracic & cardiovascular surgery] (7)  
341 11 and 115 [giornale italiano di cardiologia] (9)  
342 11 and 116 [global heart] (2)  
343 11 and 117 [harvard heart letter] (0)  
344 11 and 118 [heart] (21)  
345 11 and 119 [heart advisor] (0)  
346 11 and 120 [heart & vessels] (20)  
347 11 and 121 [heart failure clinics] (3)  
348 11 and 122 [heart failure reviews] (18)  
349 11 and 123 [heart lung & circulation] (15)  
350 11 and 124 [heart & lung] (8)  
351 11 and 125 [heart rhythm] (24)  
352 11 and 126 [heart surgery forum] (3)  
353 11 and 127 [HJC hellenic journal of cardiology] (9)  
354 11 and 128 [herz] (31)  
355 11 and 129 [herzschriftmachertherapie und elektrophysiologie] (5)  
356 11 and 130 [high blood pressure & cardiovascular prevention] (7)  
357 11 and 131 [hipertension y riesgo vascular] (1)  
358 11 and 132 [hypertension] (27)  
359 11 and 133 [hypertension in pregnancy] (6)  
360 11 and 134 [hypertension research clinical & experimental] (9)  
361 11 and 135 [indian heart journal] (12)  
362 11 and 136 [innovations] (0)  
363 11 and 137 [interactive cardiovascular & thoracic surgery] (37)  
364 11 and 138 [international angiology] (11)  
365 11 and 139 [international heart journal] (13)  
366 11 and 140 [international journal of cardiology] (126)  
367 11 and 141 [international journal of stroke] (48)  
368 11 and 142 [interventional cardiology clinics] (5)  
369 11 and 143 [jacc cardiovascular imaging] (30)  
370 11 and 144 [jacc cardiovascular interventions] (65)  
371 11 and 145 [jacc clinical electrophysiology] (15)  
372 11 and 146 [jacc heart failure] (27)

373 11 and 147 [jama cardiology] (38)  
374 11 and 148 [journal de medecine vasculaire] (3)  
375 11 and 149 [journal of atherosclerosis & thrombosis] (17)  
376 11 and 150 [journal of cardiac failure] (17)  
377 11 and 151 [journal of cardiac surgery] (6)  
378 11 and 152 [journal of cardiology] (24)  
379 11 and 153 [journal of cardiopulmonary rehabilitation & prevention] (24)  
380 11 and 154 [journal of cardiothoracic & vascular anesthesia] (66)  
381 11 and 155 [journal of cardiothoracic surgery] (8)  
382 11 and 156 [journal of cardiovascular computed tomography] (5)  
383 11 and 157 [journal of cardiovascular electrophysiology] (19)  
384 11 and 158 [journal of cardiovascular magnetic resonance] (4)  
385 11 and 159 [journal of cardiovascular medicine] (8)  
386 11 and 160 [journal of cardiovascular nursing] (13)  
387 11 and 161 [journal of cardiovascular pharmacology] (14)  
388 11 and 162 [journal of cardiovascular pharmacology & therapeutics] (17)  
389 11 and 163 [journal of cardiovascular surgery] (24)  
390 11 and 164 [journal of cardiovascular translational research] (7)  
391 11 and 165 [journal of cerebral blood flow & metabolism] (9)  
392 11 and 166 [journal of clinical hypertension] (23)  
393 11 and 167 [journal of echocardiography] (0)  
394 11 and 168 [journal of electrocardiology] (5)  
395 11 and 169 [journal of endovascular therapy] (11)  
396 11 and 170 [journal of heart & lung transplantation] (15)  
397 11 and 171 [journal of heart valve disease] (0)  
398 11 and 172 [journal of human hypertension] (14)  
399 11 and 173 [journal of hypertension] (49)  
400 11 and 174 [journal of interventional cardiac electrophysiology] (25)  
401 11 and 175 [journal of interventional cardiology] (21)  
402 11 and 176 [journal of invasive cardiology] (18)  
403 11 and 177 [journal of molecular & cellular cardiology] (1)  
404 11 and 178 [journal of nuclear cardiology] (8)  
405 11 and 179 [journal of stroke & cerebrovascular diseases] (62)  
406 11 and 180 [journal of the american college of cardiology] (83)  
407 11 and 181 [journal of the american heart association] (85)  
408 11 and 182 [journal of the american society of hypertension] (13)  
409 11 and 183 [journal of thoracic & cardiovascular surgery] (58)  
410 11 and 184 [journal of thrombosis & haemostasis] (28)  
411 11 and 185 [journal of vascular access] (21)  
412 11 and 186 [journal of vascular & interventional radiology] (20)  
413 11 and 187 [journal of vascular nursing] (1)  
414 11 and 188 [journal of vascular research] (0)  
415 11 and 189 [journal of vascular surgery] (61)  
416 11 and 190 [j vasc surg venous lymphat disord] (15)  
417 11 and 191 [journal of veterinary cardiology] (0)  
418 11 and 192 [kardiologia polska] (8)  
419 11 and 193 [kardiologiia] (8)  
420 11 and 194 [methodist debakey cardiovascular journal] (2)  
421 11 and 195 [microcirculation] (2)  
422 11 and 196 [microvascular research] (6)  
423 11 and 197 [minerva cardioangiologica] (14)  
424 11 and 198 [multimedia manual of cardiothoracic surgery] (0)  
425 11 and 199 [nature reviews cardiology] (5)  
426 11 and 200 [nutrition metabolism & cardiovascular diseases] (22)  
427 11 and 201 [pacing & clinical electrophysiology] (25)



428 11 and 202 [pediatric cardiology] (9)  
429 11 and 203 [perfusion] (17)  
430 11 and 204 [phlebology] (15)  
431 11 and 205 [pregnancy hypertension] (9)  
432 11 and 206 [progress in cardiovascular diseases] (13)  
433 11 and 207 [reviews in cardiovascular medicine] (1)  
434 11 and 208 [revista espanola de cardiologia] (12)  
435 11 and 209 [revista portuguesa de cardiologia] (7)  
436 11 and 210 [revista portuguesa de cirurgia cardio toracica e vascular] (0)  
437 11 and 211 [scandinavian cardiovascular journal] (4)  
438 11 and 212 [scandinavian cardiovascular journal supplement] (0)  
439 11 and 213 [seminars in thoracic & cardiovascular surgery] (8)  
440 11 and 214 [seminars in thoracic & cardiovascular surgery pediatric cardiac surgery  
annual] (0)  
441 11 and 215 [seminars in thrombosis & hemostasis] (4)  
442 11 and 216 [seminars in vascular surgery] (0)  
443 11 and 217 [shock] (47)  
444 11 and 218 [stroke] (90)  
445 11 and 219 [techniques in vascular & interventional radiology] (0)  
446 11 and 220 [texas heart institute journal] (1)  
447 11 and 221 [therapeutic advances in cardiovascular disease] (4)  
448 11 and 222 [thoracic & cardiovascular surgeon reports] (0)  
449 11 and 223 [thrombosis & haemostasis] (21)  
450 11 and 224 [thrombosis research] (31)  
451 11 and 225 [topics in stroke rehabilitation] (19)  
452 11 and 226 [translational stroke research] (9)  
453 11 and 227 [trends in cardiovascular medicine] (5)  
454 11 and 228 [turk kardiyoloji dernegi arsivi] (2)  
455 11 and 229 [vasa] (11)  
456 11 and 230 [vascular] (7)  
457 11 and 231 [vascular & endovascular surgery] (7)  
458 11 and 232 [vascular health & risk management] (6)  
459 11 and 233 [vascular medicine] (7)  
460 11 and 234 [vascular pharmacology] (3)  
461 11 and 235 [world journal for pediatric & congenital heart surgery] (3)  
462 11 and 236 [zhonghua xin xue guan bing za zhi] (10)

\*\*\*\*\*
